# Supplementary material for: An Online Intervention Comparing a Very Low-Carbohydrate Ketogenic Diet and Lifestyle Recommendations Versus a Plate Method Diet in Overweight Individuals With Type 2 Diabetes: A Randomized Controlled Trial
Source: PubMed Central journal article supplement (PMC5329646; doi:10.2196/jmir.5806), 2017-02-13
Supplement: jmir_v19i2e36_app1.pdf [file jmir_v19i2e36_app1.pdf]

Appendix Table 1. Baseline values of physical symptoms.

|                               | Intervention group | Control group |
|-------------------------------|--------------------|---------------|
| Cold, mean (SD)               | 1.5 (0.8)          | 1.7 (1.4)     |
| Allergy, mean (SD)            | 1.2 (0.4)          | 1.4 (0.9)     |
| Dizziness, mean (SD)          | 1.7 (1.2)          | 1.2 (0.4)     |
| Rapid heartbeat, mean (SD)    | 1.7 (1.2)          | 1.4 (0.9)     |
| Short breath, mean (SD)       | 1.3 (0.6)          | 1.0 (0.0)     |
| Ache, mean (SD)               | 3.0 (1.3)          | 2.7 (1.3)     |
| Headaches, mean (SD)          | 2.1 (1.2)          | 1.3 (0.8)     |
| Acne and oily skin, mean (SD) | 1.4 (0.8)          | 1.5 (1.1)     |
| Cramps, mean (SD)             | 1.8 (1.3)          | 1.8 (1.0)     |
| Heartburn, mean (SD)          | 1.6 (0.8)          | 1.4 (0.8)     |
| Constipation, mean (SD)       | 1.2 (0.4)          | 1.5 (1.0)     |
| Diarrhea, mean (SD)           | 1.5 (0.7)          | 1.3 (0.6)     |
| Nausea, mean (SD)             | 1.8 (1.2)          | 1.5 (0.8)     |
| Bloat/gas, mean (SD)          | 2.0 (1.0)          | 1.7 (1.1)     |
