# Supplementary material for: An Online Intervention Comparing a Very Low-Carbohydrate Ketogenic Diet and Lifestyle Recommendations Versus a Plate Method Diet in Overweight Individuals With Type 2 Diabetes: A Randomized Controlled Trial
Source: PubMed Central journal article supplement (PMC5329646; doi:10.2196/jmir.5806), 2017-02-13
Supplement: jmir_v19i2e36_app2.pdf [file jmir_v19i2e36_app2.pdf]

Appendix table 2. Change in symptoms from baseline.

|                         | Intervention group | Control group | Cohen's <i>d</i> between groups |
|-------------------------|--------------------|---------------|---------------------------------|
| Cold, mean (SD)         |                    |               |                                 |
| 16 weeks                | -0.5 (0.8)         | -0.7 (1.8)    | 0.2                             |
| 32 weeks                | 0.1 (0.7)          | 0.1 (2.2)     | 0.0                             |
| Allergy, mean (SD)      |                    |               |                                 |
| 16 weeks                | 0.2 (0.8)          | 0.2 (1.1)     | 0.0                             |
| 32 weeks                | -0.1 (0.3)         | 0.4 (1.6)     | -0.5                            |
| Dizziness, mean (SD)    |                    |               |                                 |
| 16 weeks                | -0.2 (1.1)         | 0.1 (0.3)     | -0.4                            |
| 32 weeks                | 0.0 (0.5)          | -0.1 (0.4)    | 0.3                             |
| Heartbeat, mean (SD)    |                    |               |                                 |
| 16 weeks                | -0.5 (1.2)         | 0.0 (0.5)     | -0.5                            |
| 32 weeks                | 0.0 (0.5)          | 0.0 (0.6)     | 0.0                             |
| Short breath, mean (SD) |                    |               |                                 |
| 16 weeks                | -0.1 (0.7)         | 0.0 (0.0)     | -0.2                            |
| 32 weeks                | 0.3 (0.7)          | 0.0 (0.0)     | 0.6                             |
| Ache, mean (SD)         |                    |               |                                 |
| 16 weeks                | 0.0 (1.3)          | 0.2 (1.2)     | -0.2                            |
| 32 weeks                | 0.1 (1.7)          | -0.1 (1.1)    | 0.2                             |
| Headaches, mean (SD)    |                    |               |                                 |
| 16 weeks                | -0.7 (0.8)         | 0.3 (0.5)     | -1.4                            |
| 32 weeks                | -0.2 (0.4)         | 0.3 (0.5)     | -1.1                            |
| Acne, mean (SD)         |                    |               |                                 |
| 16 weeks                | 0.0 (0.8)          | -0.1 (1.8)    | 0.1                             |
| 32 weeks                | 0.0 (0.0)          | 0.0 (1.0)     | 0.0                             |
| Skin, mean (SD)         |                    |               |                                 |
| 16 weeks                | 0.0 (0.0)          | -0.3 (1.9)    | 0.3                             |
| 32 weeks                | 0.0 (0.0)          | -0.3 (1.3)    | 0.3                             |
| Cramps, mean (SD)       |                    |               |                                 |
| 16 weeks                | 0.4 (0.7)          | 0.0 (1.0)     | 0.4                             |
| 32 weeks                | 0.0 (0.5)          | 0.1 (1.2)     | -0.2                            |
| Heartburn, mean (SD)    |                    |               |                                 |
| 16 weeks                | -0.3 (0.8)         | 0.1 (0.8)     | -0.5                            |
| 32 weeks                | -0.1 (0.7)         | -0.1 (0.4)    | 0.1                             |
| Constipation, mean (SD) |                    |               |                                 |
| 16 weeks                | 0.7 (1.0)          | 0.0 (0.5)     | 0.9                             |
| 32 weeks                | 0.3 (0.5)          | 0.0 (0.6)     | 0.6                             |
| Diarrhea, mean (SD)     |                    |               |                                 |
| 16 weeks                | 0.1 (1.2)          | -0.1 (0.3)    | 0.2                             |
| 32 weeks                | -0.3 (0.5)         | 0.0 (0.0)     | -0.9                            |
| Nausea, mean (SD)       |                    |               |                                 |
| 16 weeks                | 0.1 (1.2)          | -0.1 (1.1)    | 0.2                             |
| 32 weeks                | 0.0 (0.8)          | 0.1 (0.4)     | -0.2                            |
| Bloat/gas, mean (SD)    |                    |               |                                 |
| 16 weeks                | -0.4 (1.3)         | 1.2 (1.2)     | -1.3                            |
| 32 weeks                | -0.3 (1.4)         | 0.9 (1.1)     | -0.9                            |
